# Supplementary material for: Formation and sintering of Pt nanoparticles on vicinal rutile TiO2 surfaces
Source: Royal Society of Chemistry journal article supplement (doi:10.1039/c4cp02716g), 2014-01-01
Supplement: c4cp02716g1.pdf [file c4cp02716g1.pdf]

# Formation and Sintering of Pt Nanoparticles on Vicinal Rutile TiO<sub>2</sub> Surfaces

## Supporting Information

Felix Rieboldt, Stig Helveg, Ralf Bechstein, Lutz Lammich, Flemming Besenbacher,  
Jeppe Vang Lauritsen, and Stefan Wendt\*

**\*Corresponding Author**

E-mail: [swendt@phys.au.dk](mailto:swendt@phys.au.dk)

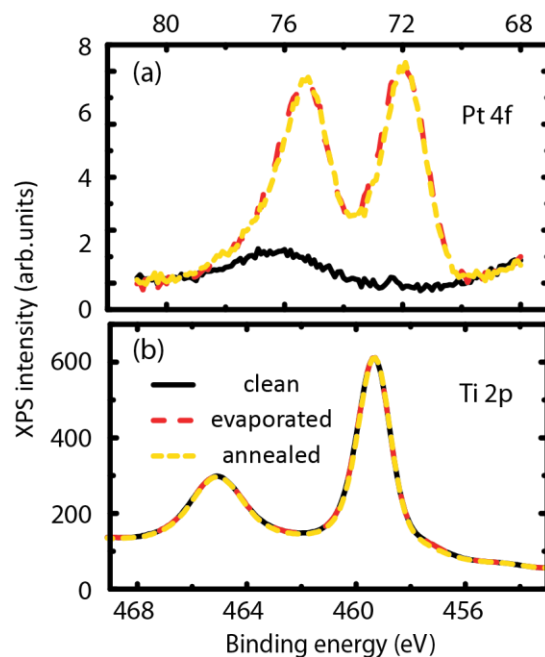

Figure S1. XPS Pt 4f (a) and Ti 2p (b) spectra of the clean (black), freshly Pt covered (red) and subsequently at 800 K annealed (yellow) HR-TiO<sub>2</sub> (110) surface. These XPS data indicate that no Pt was lost during vacuum-annealing. Similar results were obtained for the SR-TiO<sub>2</sub> (110) surface and the vicinal (870) and (771) surfaces. The peak at 76 eV BE in the Pt 4f spectrum of clean HR-TiO<sub>2</sub> arose from the sample holder (tantalum).

Additional STM data, showing the evolution of an SR-TiO<sub>2</sub> (110) surface upon 10 L O<sub>2</sub> exposure at ~108 K, followed by vacuum-annealing at various temperatures. Clearly, O<sub>br vac.</sub>'s re-appear in substantial amounts only following vacuum-annealing at ~700 K.

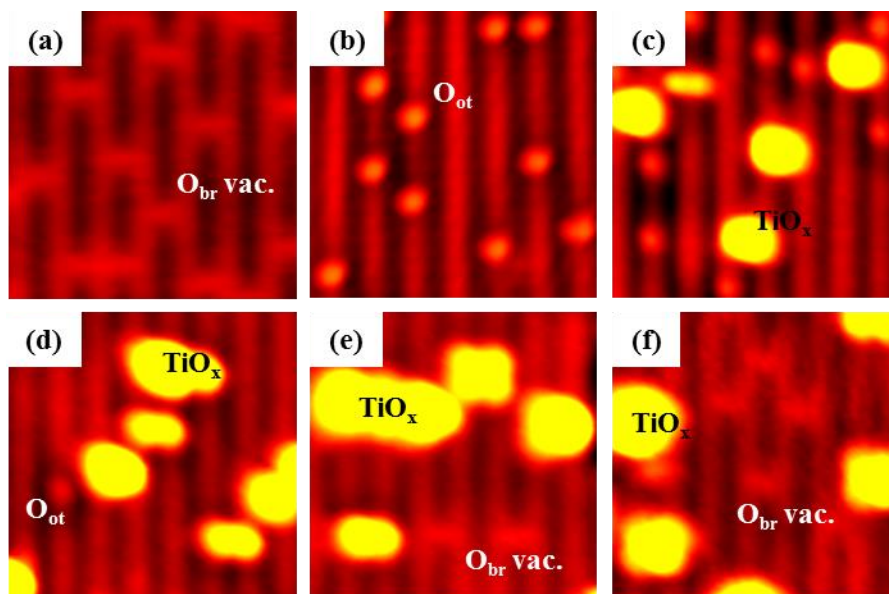

Figure S2. Zoom-in STM images ( $45 \text{ \AA} \times 45 \text{ \AA}$ ) of a clean TiO<sub>2</sub> (110) acquired after 22 preparation cycles (a), after 10 L O<sub>2</sub> exposure at ~108 K to clean TiO<sub>2</sub> (110) (b), after subsequent vacuum-annealing at ~450 K (c), ~520 K (d), ~600 K (e) and ~700 K (f), respectively. All the annealing experiments were conducted within the same series of STM experiments. The annealing time was in each case 2 min. Examples for O<sub>br vac.</sub>'s, O<sub>ot</sub> adatoms, and TiO<sub>x</sub> species are indicated directly in the STM images.
